# Supplementary material for: Atrial Septal Defect with Eisenmenger Syndrome: A Rare Presentation
Source: Hindawi journal article supplement (doi:10.1155/2020/8681761), 2020-03-09
Supplement: f1 [file 8681761.f1.pdf]

## Right heart catheterization data

---

Right Atrium: mean 0 mmHg  
Right ventricle: 84/2 mmHg  
Pulmonary artery: 83/27, mean 47 mmHg  
Pulmonary capillary wedge: 2/4, mean 2 mmHg  
Cardiac output: 5.2 L/min  
Cardiac index: 3.2 L/min/m<sup>2</sup>  
Pulmonary vascular resistance: 8.7 Wood units

No response to Inhaled Nitric Oxide up to 80 per million:

Pulmonary artery (20 ppm): 76/23, mean 43 mmHg  
Pulmonary artery (40 ppm): 75/22, mean 43 mmHg  
Pulmonary artery (80 ppm): 75/23, mean 43 mmHg

Pulmonary artery: 71%  
Mid right atrium: 70%  
Superior vena cava: 60%  
Inferior vena cava 59%  
Pulmonary venous (assumed): 99%  
Systemic (aorta): 89%  
pulmonary blood flow to systemic blood flow ratio Qp/Qs= 1.0

## Blood data

---

|                                      |                         |
|--------------------------------------|-------------------------|
| White blood cell count               | 9.2x10 <sup>3</sup> /ul |
| Hemoglobin concentration             | 14.2g/dl                |
| Platelet count                       | 208k/ul                 |
| International Normalized ratio, INR  | 1.1                     |
| Sodium                               | 139 mmol/L              |
| Potassium                            | 4.0 mmol/L              |
| Blood Urea Nitrogen                  | 18 mg/dL                |
| Creatinine                           | 0.51 mg/dL              |
| Glucose                              | 104 mg/dL               |
| B-type Natriuretic Peptide           | 702 pg/mL               |
| Troponin                             | <0.012 ng/mL            |
| Troponin 4 hours later               | <0.012 ng/mL            |
| Tyrosine stimulating hormone         | 1.098 uIU/mL            |
| Alanine aminotransferase             | 30U/l                   |
| Aspartate aminotransferase           | 46U/l                   |
| Total bilirubin                      | 0.6mg/dl                |
| Hepatitis C antibody                 | Negative                |
| HIV antigen/antibody screen          | Negative                |
| Beta HCG qualitative                 | Negative                |
| Antinuclear antibody, ANA            | Negative                |
| C reactive protein, high sensitivity | 1.6mg/L                 |

|                                |                 |
|--------------------------------|-----------------|
| Erythrocyte sedimentation rate | 26mm/hour       |
| D dimer                        | <230 D-DU ng/mL |

### Transthoracic echocardiographic data

|                                            |                                     |                                                   |
|--------------------------------------------|-------------------------------------|---------------------------------------------------|
| IVSd: 0.72 cm                              | LALs A4C: 6.16 cm                   | HR: 60 BPM                                        |
| LVIDd: 4.0 cm                              | LAAs A4C: 18.98 cm <sup>2</sup>     | AVA Vmax: 1.91 cm <sup>2</sup>                    |
| EDV(Teich): 70.40 ml                       | TAPSE: 1.6 cm                       | AVA (VTI): 1.72 cm <sup>2</sup>                   |
| LVPWd: 0.72 cm                             | RVOT maxPG: 0.06 mmHg               | AVAI (VTI): 1.058 cm <sup>2</sup> /m <sup>2</sup> |
| LVd Mass (ASE): 81.89 g                    | RVOT Vmax: 0.13 m/s                 | AVAI Vmax: 1.174 cm <sup>2</sup> /m <sup>2</sup>  |
| LVd Mass Ind (ASE): 50.24 g/m <sup>2</sup> | MV E Vel: 0.61 m/s                  | P Vein S: 0.51 m/s                                |
| RWT: 0.36                                  | MV DecT: 192.37 ms                  | P Vein D: 0.33 m/s                                |
| LVIDs: 3.0 cm                              | MV Dec Slope: 3.19 m/s <sup>2</sup> | P Vein S/D Ratio: 1.55                            |
| ESV(Teich): 34.74 ml                       | MV A Vel: 0.69 m/s                  | P Vein A: 0.25 m/s                                |
| EF(Teich): 50.65 %                         | MV E/A Ratio: 0.89                  | P Vein A Dur: 108.47 ms                           |
| ESV(Cube): 26.76 ml                        | LVOT Vmax: 1.0 m/s                  | RVOT Vmax: 0.65 m/s                               |
| EF(Cube): 58.49 %                          | LVOT Vmean: 0.63 m/s                | RVOT maxPG: 1.67 mmHg                             |
| %FS: 25.40 %                               | LVOT maxPG: 3.78 mmHg               | PV Vmax: 1.42 m/s                                 |
| SV(Teich): 35.65 ml                        | LVOT meanPG: 1.87 mmHg              | PV maxPG: 8.11 mmHg                               |
| SI(Teich): 21.87 ml/m <sup>2</sup>         | LVOT Env.Ti: 299.71 ms              | PAEDP: 22.99 mmHg                                 |
| SV(Cube): 37.70 ml                         | LVOT VTI: 18.8 cm                   | PRend Vmax: 2.23 m/s                              |
| SI(Cube): 23.13 ml/m <sup>2</sup>          | HR: 61 BPM                          | PRend PG: 19.99 mmHg                              |
| LVOT Diam: 1.83 cm                         | LVSV Dopp: 49.65 ml                 | TR Vmax: 4.2 m/s                                  |
| LA Diam: 4.34 cm                           | LVSI Dopp: 30.46 ml/m <sup>2</sup>  | TR maxPG: 70 mmHg                                 |
| Ao asc: 3.09 cm                            | LVCO Dopp: 3.02 l/min               | RAP: 3 mmHg                                       |
| Ao st junct: 2.61 cm                       | LVCi Dopp: 1.85 l/minm <sup>2</sup> | RVSP: 73 mmHg                                     |
| RVIDd: 4.70 cm                             | AV Vmax: 1.3 m/s                    | AV DI: 0.65                                       |
| Ao sinus: 2.48 cm                          | AV Vmean: 1.0 m/s                   |                                                   |
| RVA (d): 51.91 cm <sup>2</sup>             | AV maxPG: 7 mmHg                    |                                                   |
| RVA (s): 37.17 cm <sup>2</sup>             | AV meanPG: 4 mmHg                   |                                                   |
| RV FAC: 2839 %                             | AV Env.Ti: 296.9 ms                 |                                                   |
| RA Area: 31.19 cm <sup>2</sup>             | AV VTI: 28.8 cm                     |                                                   |
